# Supplementary material for: Synthesis of Eu3+-doped Gd2O3 in hollow nanoparticle structures by controlled chemical etching with poly(acrylic acid)
Source: Royal Society of Chemistry journal article supplement (doi:10.1039/c3ra41446a), 2013-01-01
Supplement: c3ra41446a.pdf [file c3ra41446a.pdf]

## Electronic Supplementary Material

# Synthesis of $\text{Eu}^{3+}$ -doped $\text{Gd}_2\text{O}_3$ in Hollow Nanoparticle Structures by Controlled Chemical Etching with Poly(acrylic acid)

Sung-Min Yu, Jinmyung Cha, and Jin-Kyu Lee\*

Department of Chemistry, Seoul National University, Seoul 151-742, Korea

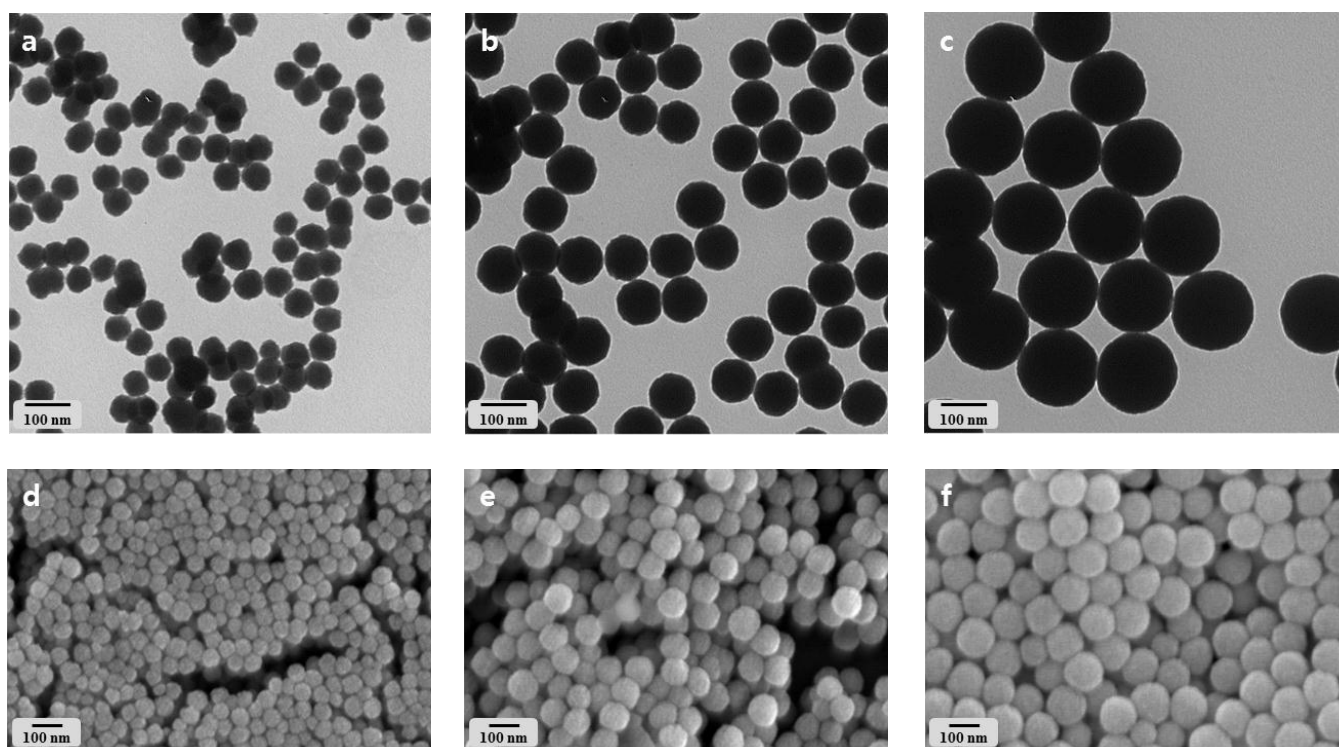

**Figure S1.** TEM and SEM images of  $\text{Eu}^{3+}:\text{Gd}(\text{OH})\text{CO}_3\cdot\text{H}_2\text{O}$  nanoparticles with various sizes of (a, d) 60 nm, (b, e) 100 nm, and (c, f) 140 nm.

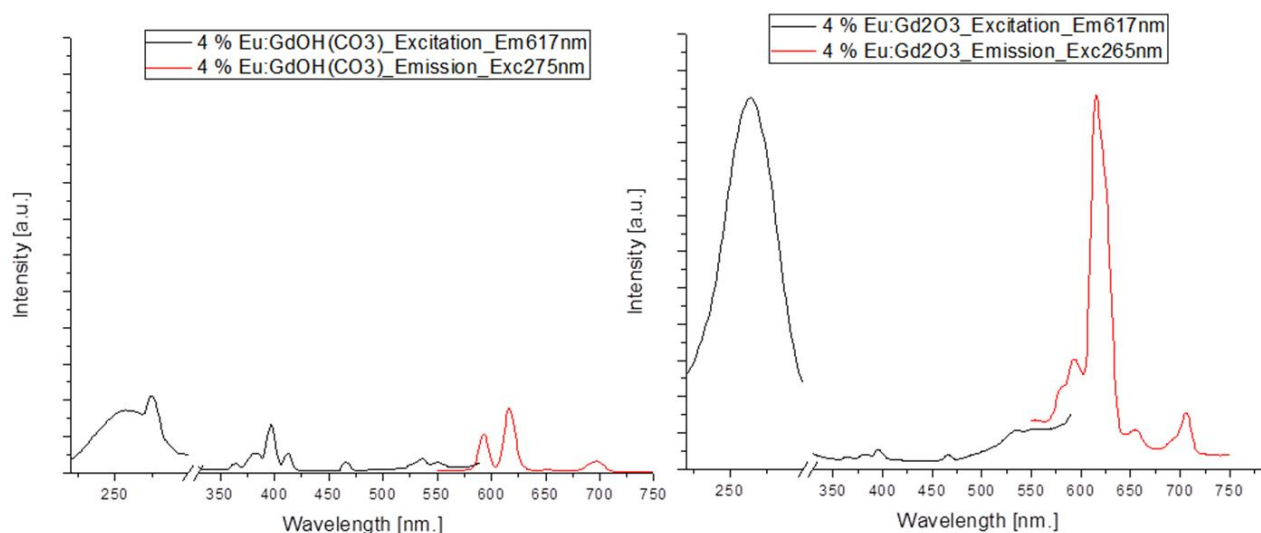

**Figure S2.** Photoluminescence excitation and emission spectra for (a) Eu<sup>3+</sup>:Gd(OH)CO<sub>3</sub>·H<sub>2</sub>O NPs and (b) Eu<sup>3+</sup>:Gd<sub>2</sub>O<sub>3</sub> NPs.

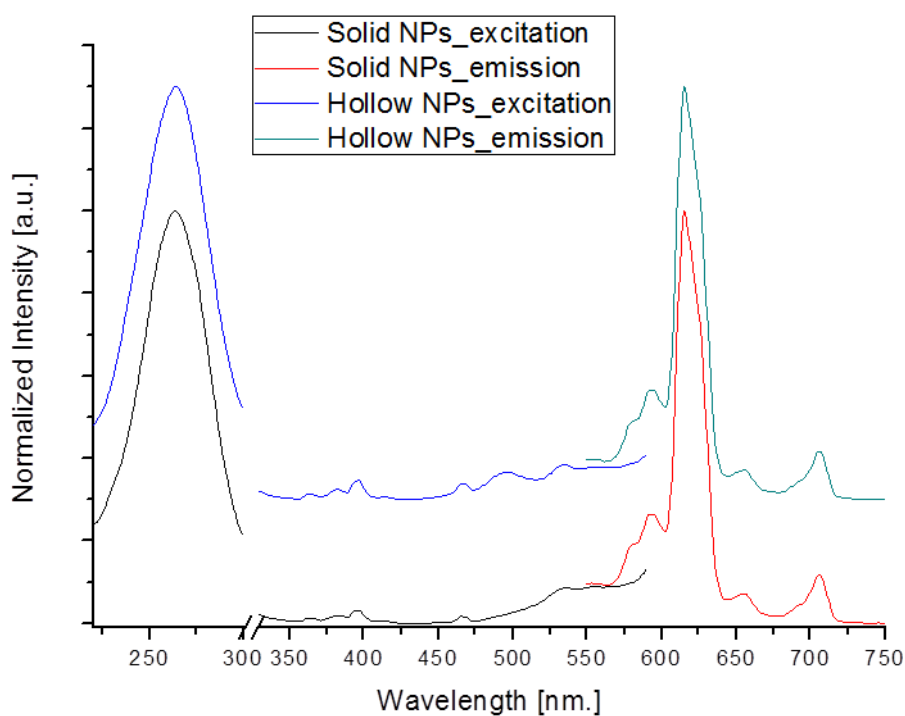

**Figure S3.** Photoluminescence excitation and emission spectra for (a) Eu<sup>3+</sup>:Gd<sub>2</sub>O<sub>3</sub> NPs and (b) hollow Eu<sup>3+</sup>:Gd<sub>2</sub>O<sub>3</sub> NPs.

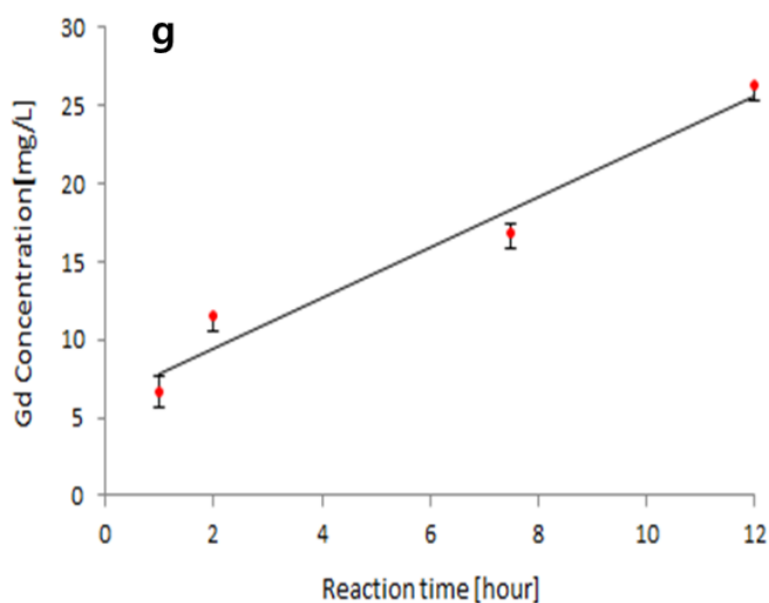

**Figure S4.** Etched amount of Gd<sup>3+</sup> in the supernatants after the appropriate reaction times, measured by ICP-AES.

**Table S1.** Eu content from the mixing ratio and after annealing at 550 °C

| Mixing condition<br>(wt% of Eu) | ICP-AES results<br>(averaged from 3 samples) |           | Average Eu content after<br>annealing at 550 °C<br>(wt% of Eu) |
|---------------------------------|----------------------------------------------|-----------|----------------------------------------------------------------|
|                                 | Gd (mg/L)                                    | Eu (mg/L) |                                                                |
| 2%                              | 57.88                                        | 1.79      | 3.09%                                                          |
| 4%                              | 67.57                                        | 3.55      | 5.25%                                                          |
| 6%                              | 69.53                                        | 6.19      | 8.90%                                                          |
| 8%                              | 77.91                                        | 7.75      | 9.95%                                                          |
| 10%                             | 83.43                                        | 12.34     | 14.79%                                                         |

**Table S2.** Reported relaxivity data of representative Gd<sub>2</sub>O<sub>3</sub>-based T<sub>1</sub> contrast agents

| Contrast agent                              | Diameter<br>(nm) | r <sub>1</sub><br>(mM <sup>-1</sup> S <sup>-1</sup> ) | r <sub>2</sub><br>(mM <sup>-1</sup> S <sup>-1</sup> ) | r <sub>2</sub> / r <sub>1</sub> | B <sub>0</sub> (T) | Specific<br>condition | Ref.      |
|---------------------------------------------|------------------|-------------------------------------------------------|-------------------------------------------------------|---------------------------------|--------------------|-----------------------|-----------|
| Gd <sub>2</sub> O <sub>3</sub> (sphere)     | ~352             | 22.2                                                  | 128.9                                                 | 5.8                             | 3                  | 0.5% agarose gel      | 16        |
| Gd <sub>2</sub> O <sub>3</sub> (cubic-like) | ~423x294         | 19.5                                                  | 89.4                                                  | 4.6                             | 3                  | 0.5% agarose gel      | 16        |
| Hollow Gd <sub>2</sub> O <sub>3</sub>       | ~200             | 17.7                                                  | 26.6                                                  | 1.5                             | 3                  | 0.5% agarose gel      | 22        |
|                                             | ~200             | 2.78                                                  | -                                                     | -                               | 4.7                | 0.5% agarose gel      | 23        |
|                                             | 2.2              | 8.8                                                   | 11.4                                                  | 1.3                             | 7                  |                       | 13        |
| Ultra small Gd <sub>2</sub> O <sub>3</sub>  | 3.8              | 8.8                                                   | 28.8                                                  | 3.4                             | 7                  |                       | 13        |
|                                             | < 3              | 9.4                                                   | 13.4                                                  | 1.4                             | 1.5                |                       | 14        |
|                                             | < 40             | 0.1                                                   | 7.6                                                   | 81.6                            | 1.5                |                       | 14        |
|                                             | 1                | 9.9                                                   | 10.5                                                  | 1.1                             | 1.5                |                       | 17        |
| Tb:Gd <sub>2</sub> O <sub>3</sub>           | ~4               | 12                                                    | -                                                     | -                               | 1.5                |                       | 20        |
| Hollow Eu:Gd <sub>2</sub> O <sub>3</sub>    | 90               | 5.8                                                   | 9.7                                                   | 1.7                             | 0.47               |                       | This work |
